# Supplementary material for: Prognostic relevance of acquired uniparental disomy in serous ovarian cancer
Source: Springer Nature journal article supplement (doi:10.1186/s12943-015-0289-1), 2015-01-01

Figure S4.

A.

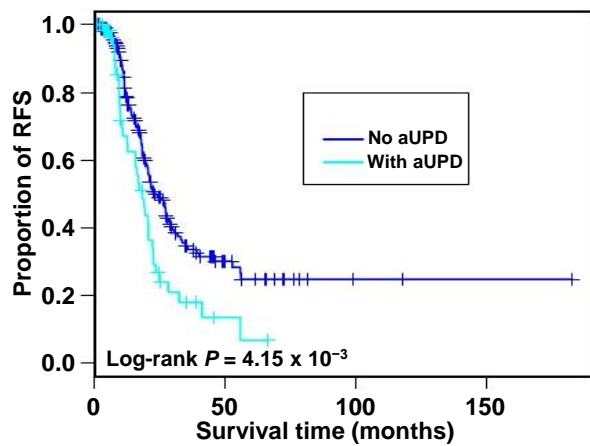

B.

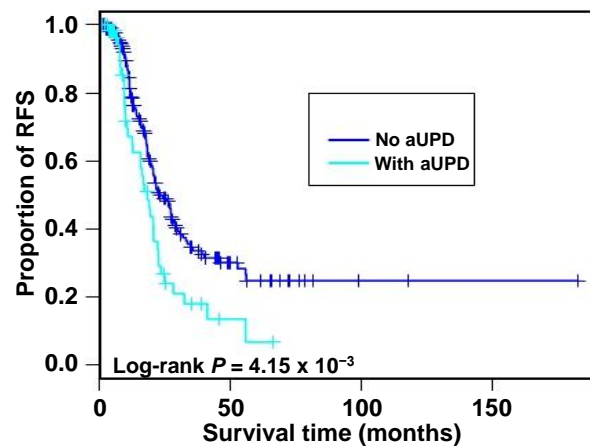

C.

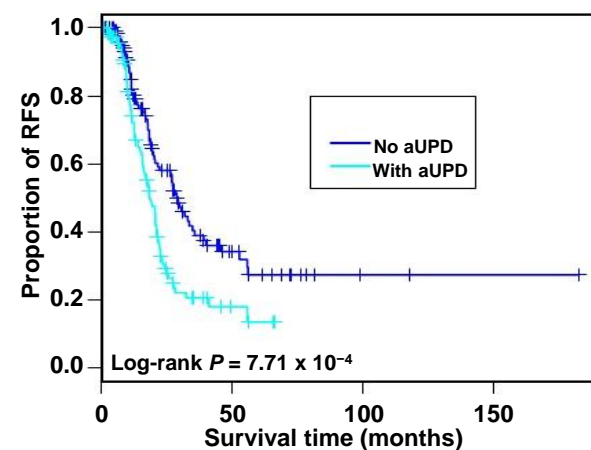

D.

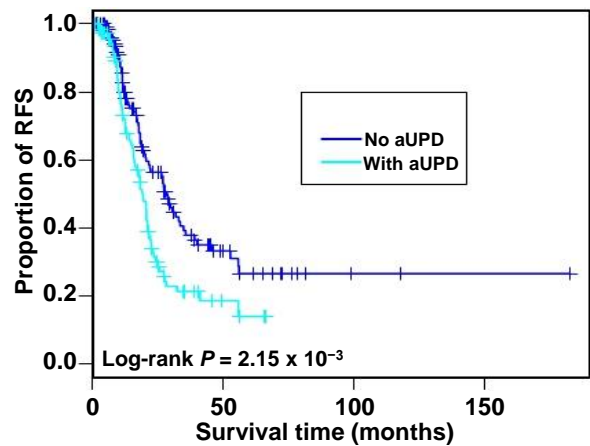

E.

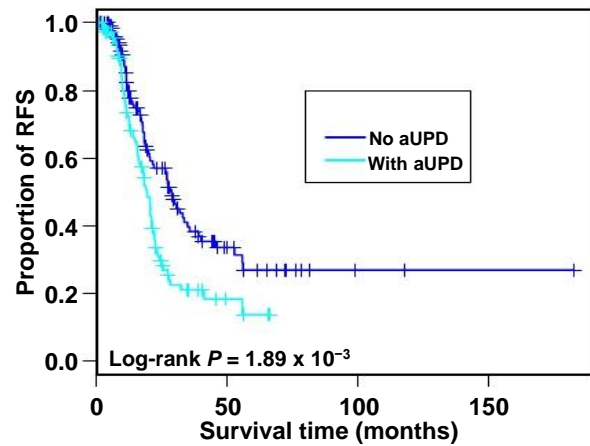

F.

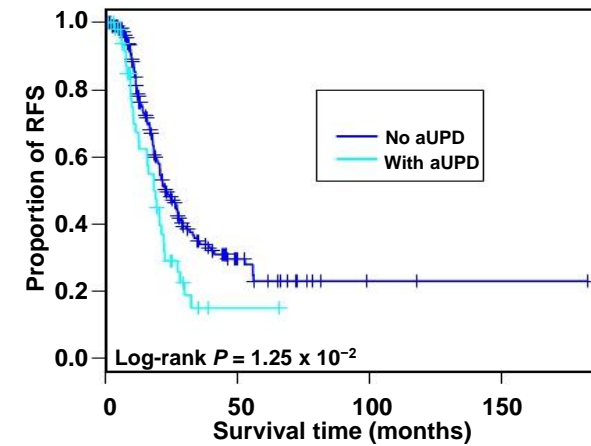

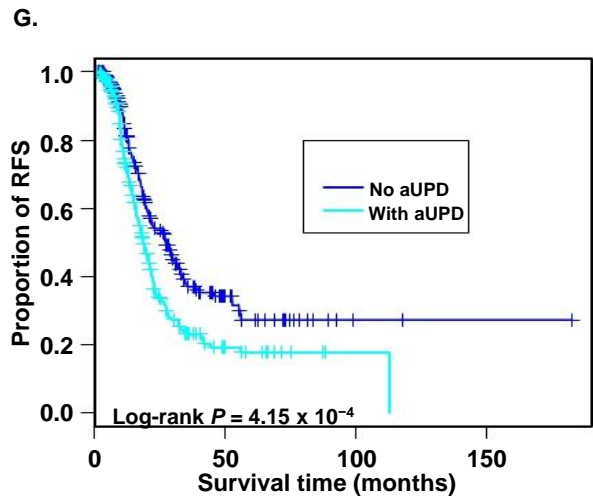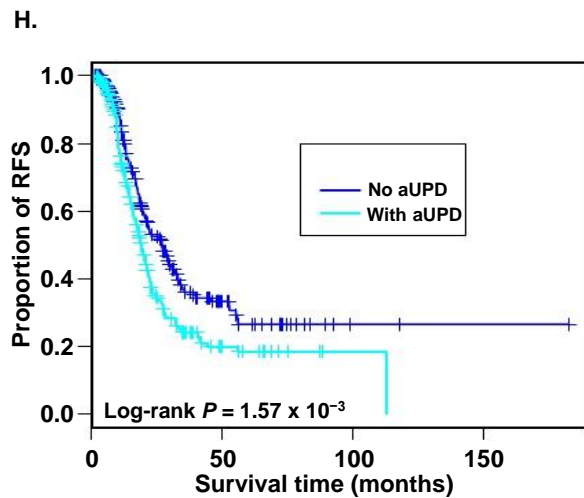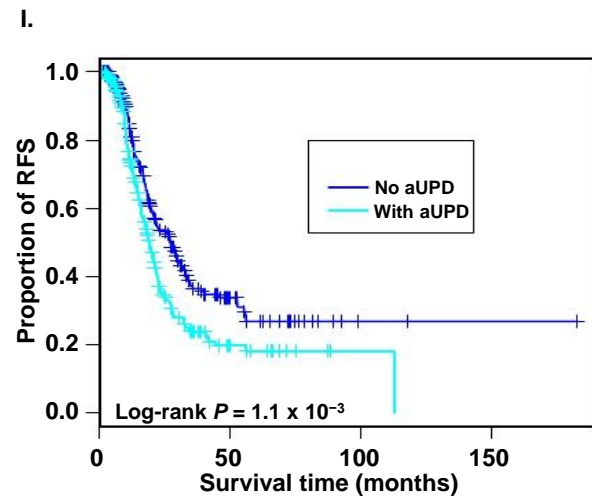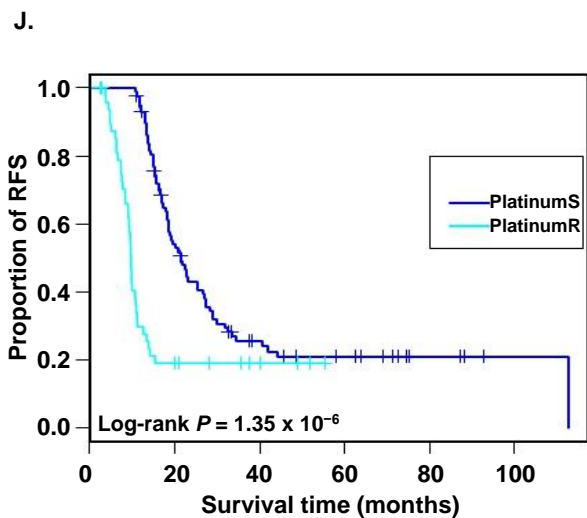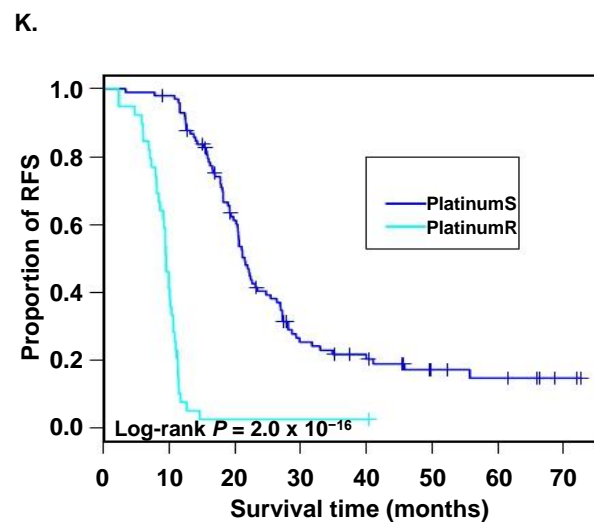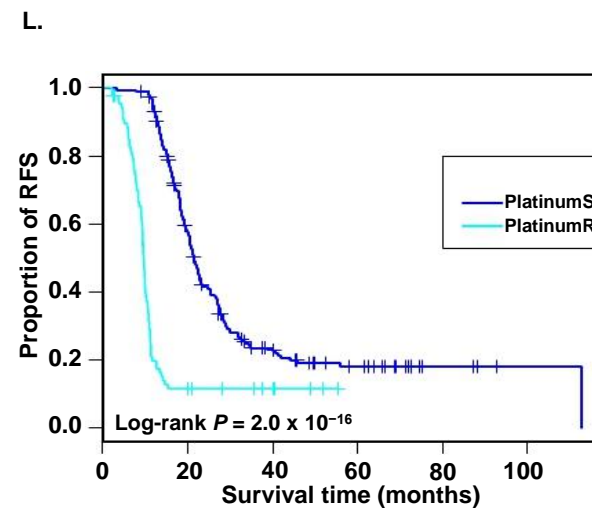

M.

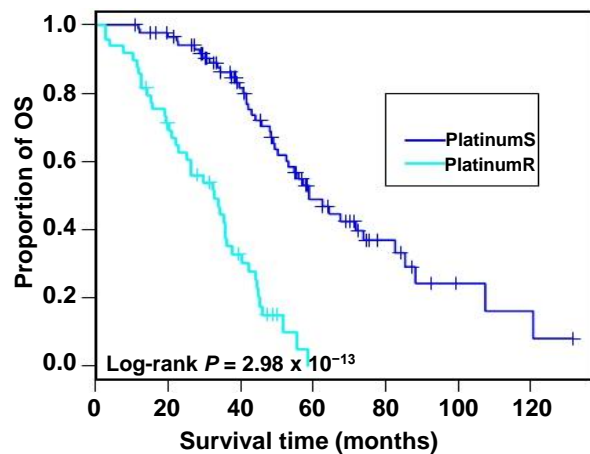

N.

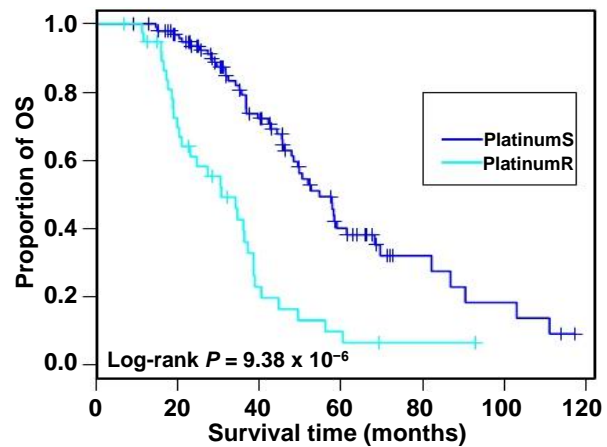

O.

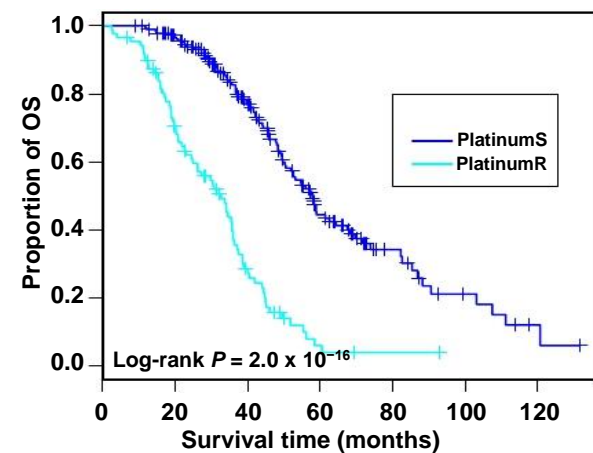

P.

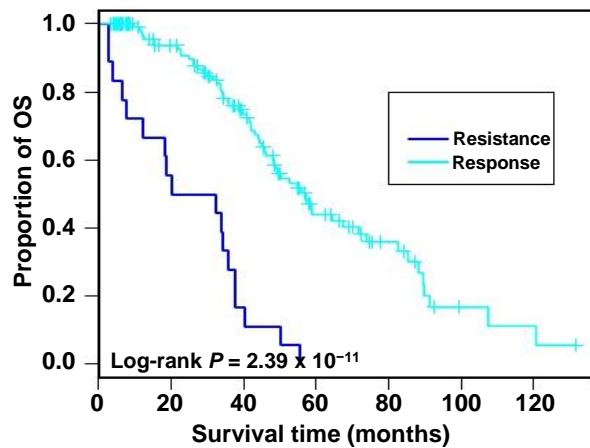

R.

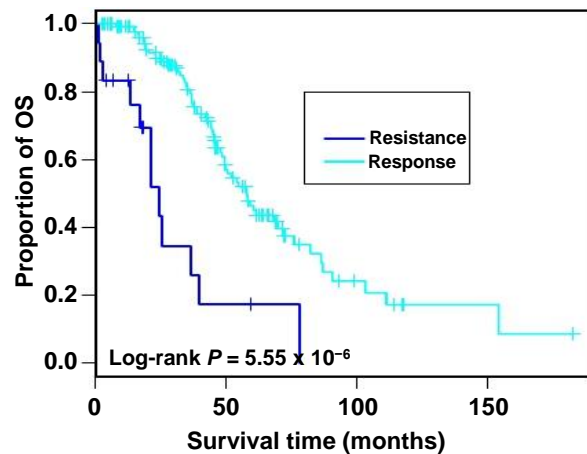

S.

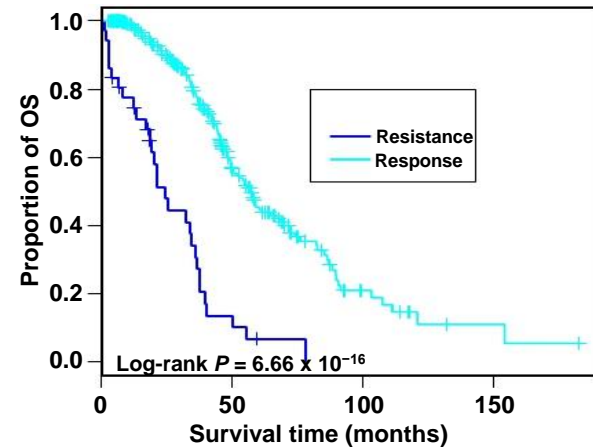

Supplement: MOESM7 [file 9762926]
