# Supplementary material for: Prognostic relevance of acquired uniparental disomy in serous ovarian cancer
Source: Springer Nature journal article supplement (doi:10.1186/s12943-015-0289-1), 2015-01-01
Supplement: MOESM1 [file 9762926]

**Table S1.** Tumor sample demographics used in clinical outcome

| Characteristic                   | TCGA<br>Sample Set A<br>(Batch#9-17)<br>270 | TCGA<br>Sample Set B<br>(Batch#18-40)<br>262 | TCGA<br>All Samples<br>(Batch#9-40)<br>532 |
|----------------------------------|---------------------------------------------|----------------------------------------------|--------------------------------------------|
| Age (years)                      |                                             |                                              |                                            |
| Mean                             | 60.2                                        | 59.2                                         | 59.7                                       |
| SD                               | 11.1                                        | 12.0                                         | 11.6                                       |
| Range                            | 34-87                                       | 26-89                                        | 26-89                                      |
| Median                           | 59                                          | 58                                           | 59                                         |
| Tumor stage                      |                                             |                                              |                                            |
| I                                | 1 (0.4%)                                    | 14 (5.3%)                                    | 15 (2.8%)                                  |
| II                               | 8 (3.0%)                                    | 18 (6.9%)                                    | 26 (4.9%)                                  |
| III                              | 213 (78.8%)                                 | 194 (74.1%)                                  | 407 (76.5%)                                |
| IV                               | 48 (17.8%)                                  | 33 (12.6%)                                   | 81 (15.2%)                                 |
| Unknown                          | 0 (0%)                                      | 3 (1.1%)                                     | 3 (0.6%)                                   |
| Tumor grade                      |                                             |                                              |                                            |
| 1                                | 0 (0%)                                      | 6 (2.3%)                                     | 6 (1.1%)                                   |
| 2                                | 17 (6.3%)                                   | 44 (16.8%)                                   | 61 (11.5%)                                 |
| 3                                | 247 (91.5%)                                 | 206 (78.6%)                                  | 453 (85.1%)                                |
| 4                                | 1 (0.4%)                                    | 0 (0%)                                       | 1 (0.2%)                                   |
| Unknown                          | 5 (1.8%)                                    | 6 (2.3%)                                     | 11 (2.1%)                                  |
| Number of patients               | 270                                         | 262                                          | 532                                        |
| Recurrent disease                |                                             |                                              |                                            |
| Yes                              | 146 (54.1%)                                 | 124 (47.3%)                                  | 270 (50.8%)                                |
| No                               | 124 (45.9%)                                 | 134 (51.2%)                                  | 258 (48.5%)                                |
| Unknown                          | 0 (0%)                                      | 4 (1.5%)                                     | 4 (0.7%)                                   |
| Mean recurrence time (days)      | 609.1                                       | 618.8                                        | 613.9                                      |
| Median recurrence time (days)    | 420.5                                       | 434                                          | 426.5                                      |
| Number of patients               | 270                                         | 262                                          | 532                                        |
| Vital status                     |                                             |                                              |                                            |
| Alive                            | 118 (43.7%)                                 | 140 (53.4%)                                  | 258 (48.5%)                                |
| Dead                             | 152 (56.3%)                                 | 122 (46.6%)                                  | 274 (51.5%)                                |
| Unknown                          | 0 (0%)                                      | 0 (0%)                                       | 0 (0%)                                     |
| Mean overall survival time (d)   | 995.2                                       | 949.9                                        | 972.8                                      |
| Median overall survival time (d) | 884.5                                       | 780                                          | 855                                        |
| Platinum status                  | 166                                         | 109                                          | 275                                        |
| Sensitive                        | 106 (63.9%)                                 | 81 (74.3%)                                   | 187 (68%)                                  |
| Resistant                        | 60 (36.1%)                                  | 28 (25.7%)                                   | 88 (32%)                                   |
| Anatomic side                    |                                             |                                              |                                            |
| Unilateral (left/right)          | 66 (24.4%)                                  | 71 (27.1%)                                   | 137 (25.7%)                                |
| Bilateral (both left and right)  | 186 (68.9%)                                 | 182 (69.5%)                                  | 368 (69.2%)                                |
| Unknown                          | 18 (6.7%)                                   | 9 (3.4%)                                     | 27 (5.1%)                                  |
| aUPD                             |                                             |                                              |                                            |
| Total aUPD (median)              | 9                                           | 9                                            | 9                                          |
