# Supplementary material for: Prognostic relevance of acquired uniparental disomy in serous ovarian cancer
Source: Springer Nature journal article supplement (doi:10.1186/s12943-015-0289-1), 2015-01-01
Supplement: MOESM3 [file 9762926]

**Table S2.** Homologous recombination (HR), potential HR genes and double strand break genes.

|                 |                |                |
|-----------------|----------------|----------------|
| <i>ATM</i>      | <i>GIYD1</i>   | <i>RAD51L3</i> |
| <i>ATR</i>      | <i>H2AFX</i>   | <i>RAD52</i>   |
| <i>BBC3</i>     | <i>HAUSP</i>   | <i>RAD54B</i>  |
| <i>BCL2</i>     | <i>HUS1</i>    | <i>RAD54L</i>  |
| <i>BCL2L1</i>   | <i>HUS1B</i>   | <i>RAD9A</i>   |
| <i>BLM</i>      | <i>KUB3</i>    | <i>RB1</i>     |
| <i>BRCA1</i>    | <i>(KU70)</i>  | <i>RBBP8</i>   |
| <i>BRCA2</i>    | <i>LIG1</i>    | <i>RPA1</i>    |
| <i>BRIP1</i>    | <i>LIG4</i>    | <i>RPA2</i>    |
| <i>BTBD12</i>   | <i>MAD1</i>    | <i>RPA3</i>    |
| <i>BUB1</i>     | <i>MAD1L1</i>  | <i>RTEL1</i>   |
| <i>BUB1B</i>    | <i>MAD2</i>    | <i>SCOTIN</i>  |
| <i>BUB1L</i>    | <i>MAD2L1</i>  | <i>SECURIN</i> |
| <i>BUB3</i>     | <i>MAD2L2</i>  | <i>SHFM1</i>   |
| <i>C19orf40</i> | <i>MDC1</i>    | <i>STK6</i>    |
| <i>CD95</i>     | <i>MDM2</i>    | <i>TEX15</i>   |
| <i>CDC20</i>    | <i>MRE11A</i>  | <i>TP53</i>    |
| <i>CDC25C</i>   | <i>MUS81</i>   | <i>TP53BP1</i> |
| <i>CDC4</i>     | <i>NBN</i>     | <i>TREX1</i>   |
| <i>CENPE</i>    | <i>NBS1</i>    | <i>UBE2N</i>   |
| <i>CHK1</i>     | <i>OBFC2A</i>  | <i>XRCC2</i>   |
| <i>CHK2</i>     | <i>OBFC2B</i>  | <i>XRCC3</i>   |
| <i>DMC1</i>     | <i>P53AIP1</i> | <i>XRCC4</i>   |
| <i>DNA-PK</i>   | <i>PALB2</i>   |                |
| <i>DR5</i>      | <i>PCNA</i>    |                |
| <i>E2F1</i>     | <i>PLK1</i>    |                |
| <i>EME1</i>     | <i>PLK2</i>    |                |
| <i>EME2</i>     | <i>PLK3</i>    |                |
| <i>FANCA</i>    | <i>PMAIP1</i>  |                |
| <i>FANCB</i>    | <i>POLD1</i>   |                |
| <i>FANCC</i>    | <i>POLD2</i>   |                |
| <i>FANCD2</i>   | <i>POLD3</i>   |                |
| <i>FANCE</i>    | <i>POLD4</i>   |                |
| <i>FANCF</i>    | <i>PTEN</i>    |                |
| <i>FANCG</i>    | <i>RAD1</i>    |                |
| <i>FANCI</i>    | <i>RAD17</i>   |                |
| <i>FANCL</i>    | <i>RAD50</i>   |                |
| <i>FANCM</i>    | <i>RAD51</i>   |                |
| <i>GEN1</i>     | <i>RAD51C</i>  |                |
|                 | <i>RAD51L1</i> |                |
