# Supplementary material for: Prognostic relevance of acquired uniparental disomy in serous ovarian cancer
Source: Springer Nature journal article supplement (doi:10.1186/s12943-015-0289-1), 2015-01-01

Figure S3.

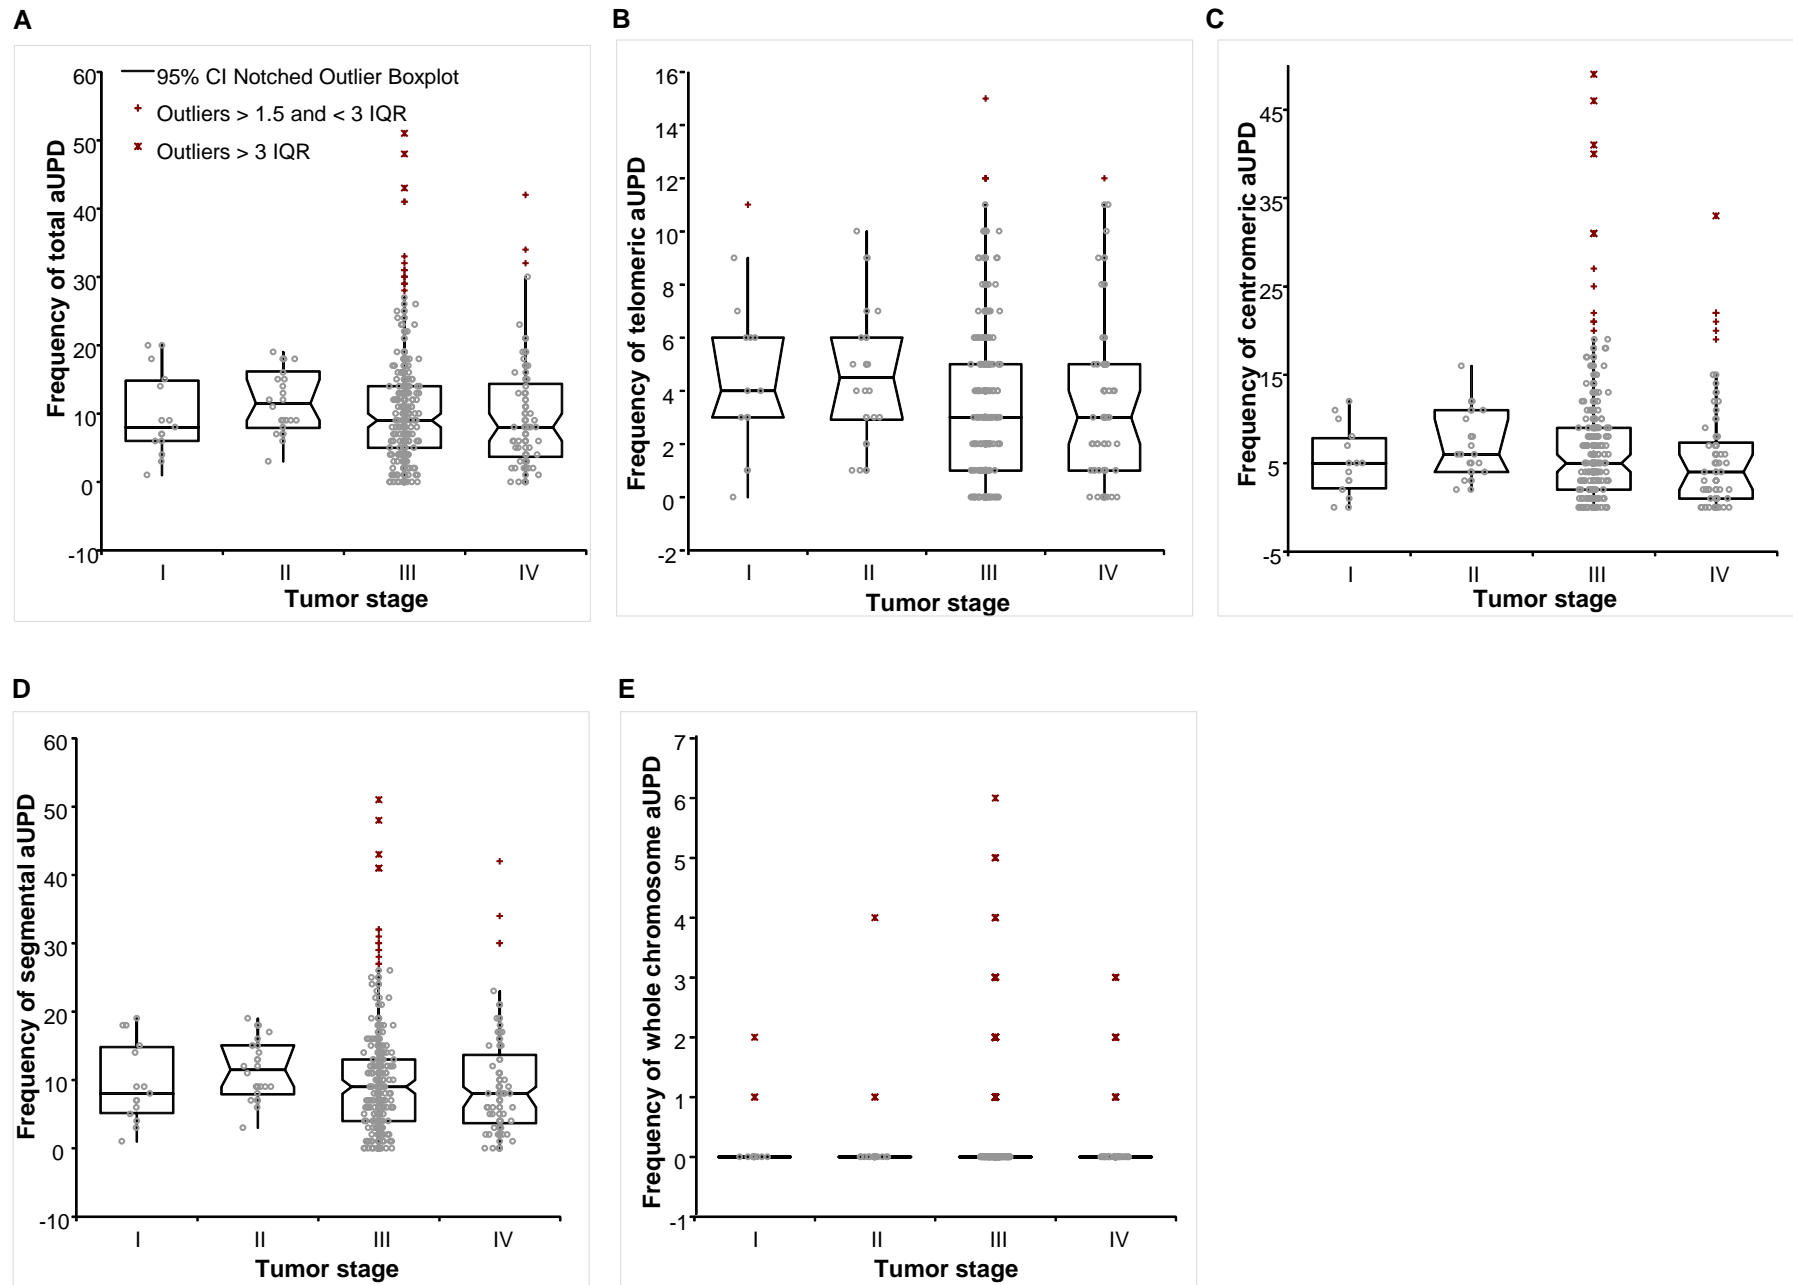

Supplement: MOESM5 [file 9762926]
