# Supplementary material for: Prognostic relevance of acquired uniparental disomy in serous ovarian cancer
Source: Springer Nature journal article supplement (doi:10.1186/s12943-015-0289-1), 2015-01-01
Supplement: MOESM6 [file 9762926]

**Table S3.** aUPD regions that associate with overall survival and/or recurrence-free survival time in all samples of serous epithelial ovarian cancer

| aUPD Region      | OS   |           |                               |               | RFS  |           |               |              |
|------------------|------|-----------|-------------------------------|---------------|------|-----------|---------------|--------------|
|                  | HR   | 95% CI    | <i>p</i>                      | <i>q</i>      | HR   | 95% CI    | <i>p</i>      | <i>q</i>     |
| 9q33.2-A         | 1.37 | 0.87-2.14 | 0.17                          | 0.32          | 1.01 | 0.62-1.65 | 0.97          | 0.98         |
| 9q34.13-B        | 1.02 | 0.66-1.59 | 0.92                          | 0.92          | 0.89 | 0.56-1.40 | 0.61          | 0.78         |
| 13q33.2-A        | 0.85 | 0.65-1.12 | 0.24                          | 0.36          | 0.89 | 0.67-1.18 | 0.43          | 0.66         |
| 13q34-B          | 0.88 | 0.67-1.15 | 0.33                          | 0.44          | 0.91 | 0.69-1.20 | 0.51          | 0.72         |
| 17p13.3-A        | 0.83 | 0.64-1.09 | 0.18                          | 0.32          | 0.99 | 0.77-1.29 | 0.96          | 0.98         |
| 17p13.3-B        | 0.85 | 0.66-1.11 | 0.24                          | 0.36          | 0.92 | 0.71-1.20 | 0.55          | 0.73         |
| 17p13.3-p13.2-C  | 0.90 | 0.69-1.17 | 0.44                          | 0.54          | 1.01 | 0.78-1.31 | 0.95          | 0.98         |
| 17p13.1-D        | 0.93 | 0.71-1.22 | 0.60                          | 0.67          | 1.13 | 0.87-1.47 | 0.37          | 0.64         |
| 17p13-E          | 1.01 | 0.76-1.35 | 0.92                          | 0.92          | 1.05 | 0.79-1.39 | 0.75          | 0.90         |
| 17q12-q21.2-A    | 1.69 | 1.30-2.20 | <b>0.0001</b>                 | <b>0.0009</b> | 1.47 | 1.11-1.93 | <b>0.007</b>  | <b>0.03</b>  |
| 17q21.2-B        | 1.39 | 1.06-1.81 | <b>0.02</b>                   | 0.07          | 1.42 | 1.07-1.87 | <b>0.01</b>   | 0.06         |
| 17q21.2-C        | 1.46 | 1.12-1.90 | <b>0.005</b>                  | <b>0.03</b>   | 1.41 | 1.06-1.86 | <b>0.02</b>   | 0.06         |
| 17q21.33-D       | 1.32 | 1.04-1.68 | <b>0.02</b>                   | 0.07          | 1.45 | 1.14-1.84 | <b>0.003</b>  | <b>0.02</b>  |
| 17q22-E          | 1.29 | 1.01-1.63 | <b>0.04</b>                   | 0.10          | 1.54 | 1.21-1.96 | <b>0.0005</b> | <b>0.008</b> |
| 17q22-F          | 1.24 | 0.98-1.57 | 0.08                          | 0.18          | 1.47 | 1.16-1.87 | <b>0.002</b>  | <b>0.02</b>  |
| 17q22-G          | 1.26 | 0.99-1.59 | 0.06                          | 0.15          | 1.49 | 1.17-1.89 | <b>0.001</b>  | <b>0.01</b>  |
| 17q25.3-H        | 1.11 | 0.87-1.43 | 0.40                          | 0.50          | 1.29 | 1.01-1.66 | <b>0.04</b>   | 0.13         |
| 22q11.22-A       | 1.12 | 0.75-1.66 | 0.59                          | 0.67          | 0.83 | 0.54-1.28 | 0.40          | 0.64         |
| 22q11.2-B        | 1.08 | 0.75-1.57 | 0.67                          | 0.73          | 0.82 | 0.56-1.22 | 0.33          | 0.64         |
| 22q13.1-C        | 1.40 | 0.94-2.09 | 0.10                          | 0.21          | 0.92 | 0.59-1.42 | 0.70          | 0.86         |
| 22q13.31-D       | 1.68 | 1.04-2.71 | <b>0.03</b>                   | 0.10          | 0.75 | 0.42-1.35 | 0.34          | 0.64         |
| <i>PTEN</i>      | 1.56 | 1.06-2.32 | <b>0.03</b>                   | 0.08          | 1.17 | 0.75-1.83 | 0.50          | 0.72         |
| <i>TP53</i>      | 0.85 | 0.65-1.11 | 0.23                          | 0.36          | 1.14 | 0.89-1.48 | 0.30          | 0.64         |
| <i>BRCA2</i>     | 1.28 | 0.94-1.74 | 0.12                          | 0.23          | 0.98 | 0.70-1.37 | 0.91          | 0.98         |
| <i>RB1</i>       | 1.17 | 0.86-1.58 | 0.32                          | 0.44          | 1.00 | 0.73-1.36 | 0.98          | 0.98         |
| <i>NF1</i>       | 1.43 | 1.08-1.89 | <b>0.01</b>                   | 0.06          | 1.42 | 1.07-1.89 | <b>0.02</b>   | 0.06         |
| <i>BRCA1</i>     | 1.18 | 0.91-1.54 | 0.21                          | 0.35          | 1.49 | 1.14-1.94 | <b>0.003</b>  | <b>0.02</b>  |
| Whole chromosome | 1.83 | 1.39-2.41 | <b>1.59 x 10<sup>-5</sup></b> | <b>0.0002</b> | 1.18 | 0.88-1.59 | 0.28          | 0.64         |

HR, hazard ratio; *q*, Benjamini-Hochberg's FDR. *q* < 0.05 was used to select features.
