# Supplementary material for: Prognostic relevance of acquired uniparental disomy in serous ovarian cancer
Source: Springer Nature journal article supplement (doi:10.1186/s12943-015-0289-1), 2015-01-01
Supplement: MOESM8 [file 9762926]

**Table S4.** Association between frequency of aUPD and mutation status of *TP53*, *BRCA1*, *BRCA2*, homolog recombination (HR) and double-strand break (DSB) genes and aUPD regions at 17q (A-H), 22q (A-D), *TP53*, *BRCA1* and *BRCA2*.

| Comparison                                                   | <i>p</i>                | <i>q</i>                      |
|--------------------------------------------------------------|-------------------------|-------------------------------|
| Somatic mutation at <i>TP53</i> vs no mutation*              | 0.004                   | <b>0.008</b>                  |
| Germline mutation at <i>BRCA1</i> vs no mutation             | 0.052                   | 0.069                         |
| Germline mutation at <i>BRCA2</i> vs no mutation             | 0.101                   | 0.127                         |
| Somatic mutation at <i>BRCA1</i> vs no mutation              | 0.871                   | 0.871                         |
| Somatic mutation at <i>BRCA2</i> vs no mutation              | 0.290                   | 0.331                         |
| Mutation at <i>BRCA1</i> (somatic & germline) vs no mutation | 0.107                   | 0.129                         |
| Mutation at <i>BRCA2</i> (somatic & germline) vs no mutation | 0.046                   | 0.069                         |
| Somatic mutation at HR and DSB genes vs no mutation          | 0.825                   | 0.860                         |
| aUPD at <i>TP53</i> vs no aUPD                               | 2.04 x 10 <sup>-6</sup> | <b>4.89 x 10<sup>-5</sup></b> |
| aUPD at <i>BRCA1</i> vs no aUPD                              | 6.54 x 10 <sup>-5</sup> | <b>0.0003</b>                 |
| aUPD at <i>BRCA2</i> vs no aUPD                              | 0.021                   | <b>0.0383</b>                 |
| aUPD at 17qA vs no aUPD                                      | 8.84 x 10 <sup>-5</sup> | <b>0.0004</b>                 |
| aUPD at 17qB vs no aUPD                                      | 1.76 x 10 <sup>-5</sup> | <b>0.0002</b>                 |
| aUPD at 17qC vs no aUPD                                      | 2.27 x 10 <sup>-5</sup> | <b>0.0002</b>                 |
| aUPD at 17qD vs no aUPD                                      | 0.0002                  | <b>0.0007</b>                 |
| aUPD at 17qE vs no aUPD                                      | 0.0005                  | <b>0.0012</b>                 |
| aUPD at 17qF vs no aUPD                                      | 0.0003                  | <b>0.0008</b>                 |
| aUPD at 17qG vs no aUPD                                      | 5.90 x 10 <sup>-5</sup> | <b>0.0003</b>                 |
| aUPD at 17qH vs no aUPD                                      | 0.0003                  | <b>0.0009</b>                 |
| aUPD at 22qA vs no aUPD                                      | 0.0494                  | 0.0688                        |
| aUPD at 22qB vs no aUPD                                      | 0.0021                  | <b>0.0046</b>                 |
| aUPD at 22qC vs no aUPD                                      | 0.0430                  | 0.0688                        |
| aUPD at 22qD vs no aUPD                                      | 0.0239                  | <b>0.0410</b>                 |

\*Kruskal-Wallis test was performed to test association between frequency of aUPD and *TP53* mutation. The remaining comparisons were performed by using Wilcoxon-rank sum test. *q*, Benjamini-Hochberg's FDR. *q* < 0.05 was used to select features.
